# Supplementary material
Source: publisher site journal article supplement (https://www.dovepress.com/article/431875)

**Figure S1. Flow diagram of patient enrollment and inclusion.**
A total of 1050 patients with moderate-to-severe atopic dermatitis were screened across seven tertiary hospitals. After exclusion of 40 patients who did not meet the inclusion criteria, 1010 patients were included in the final analysis.


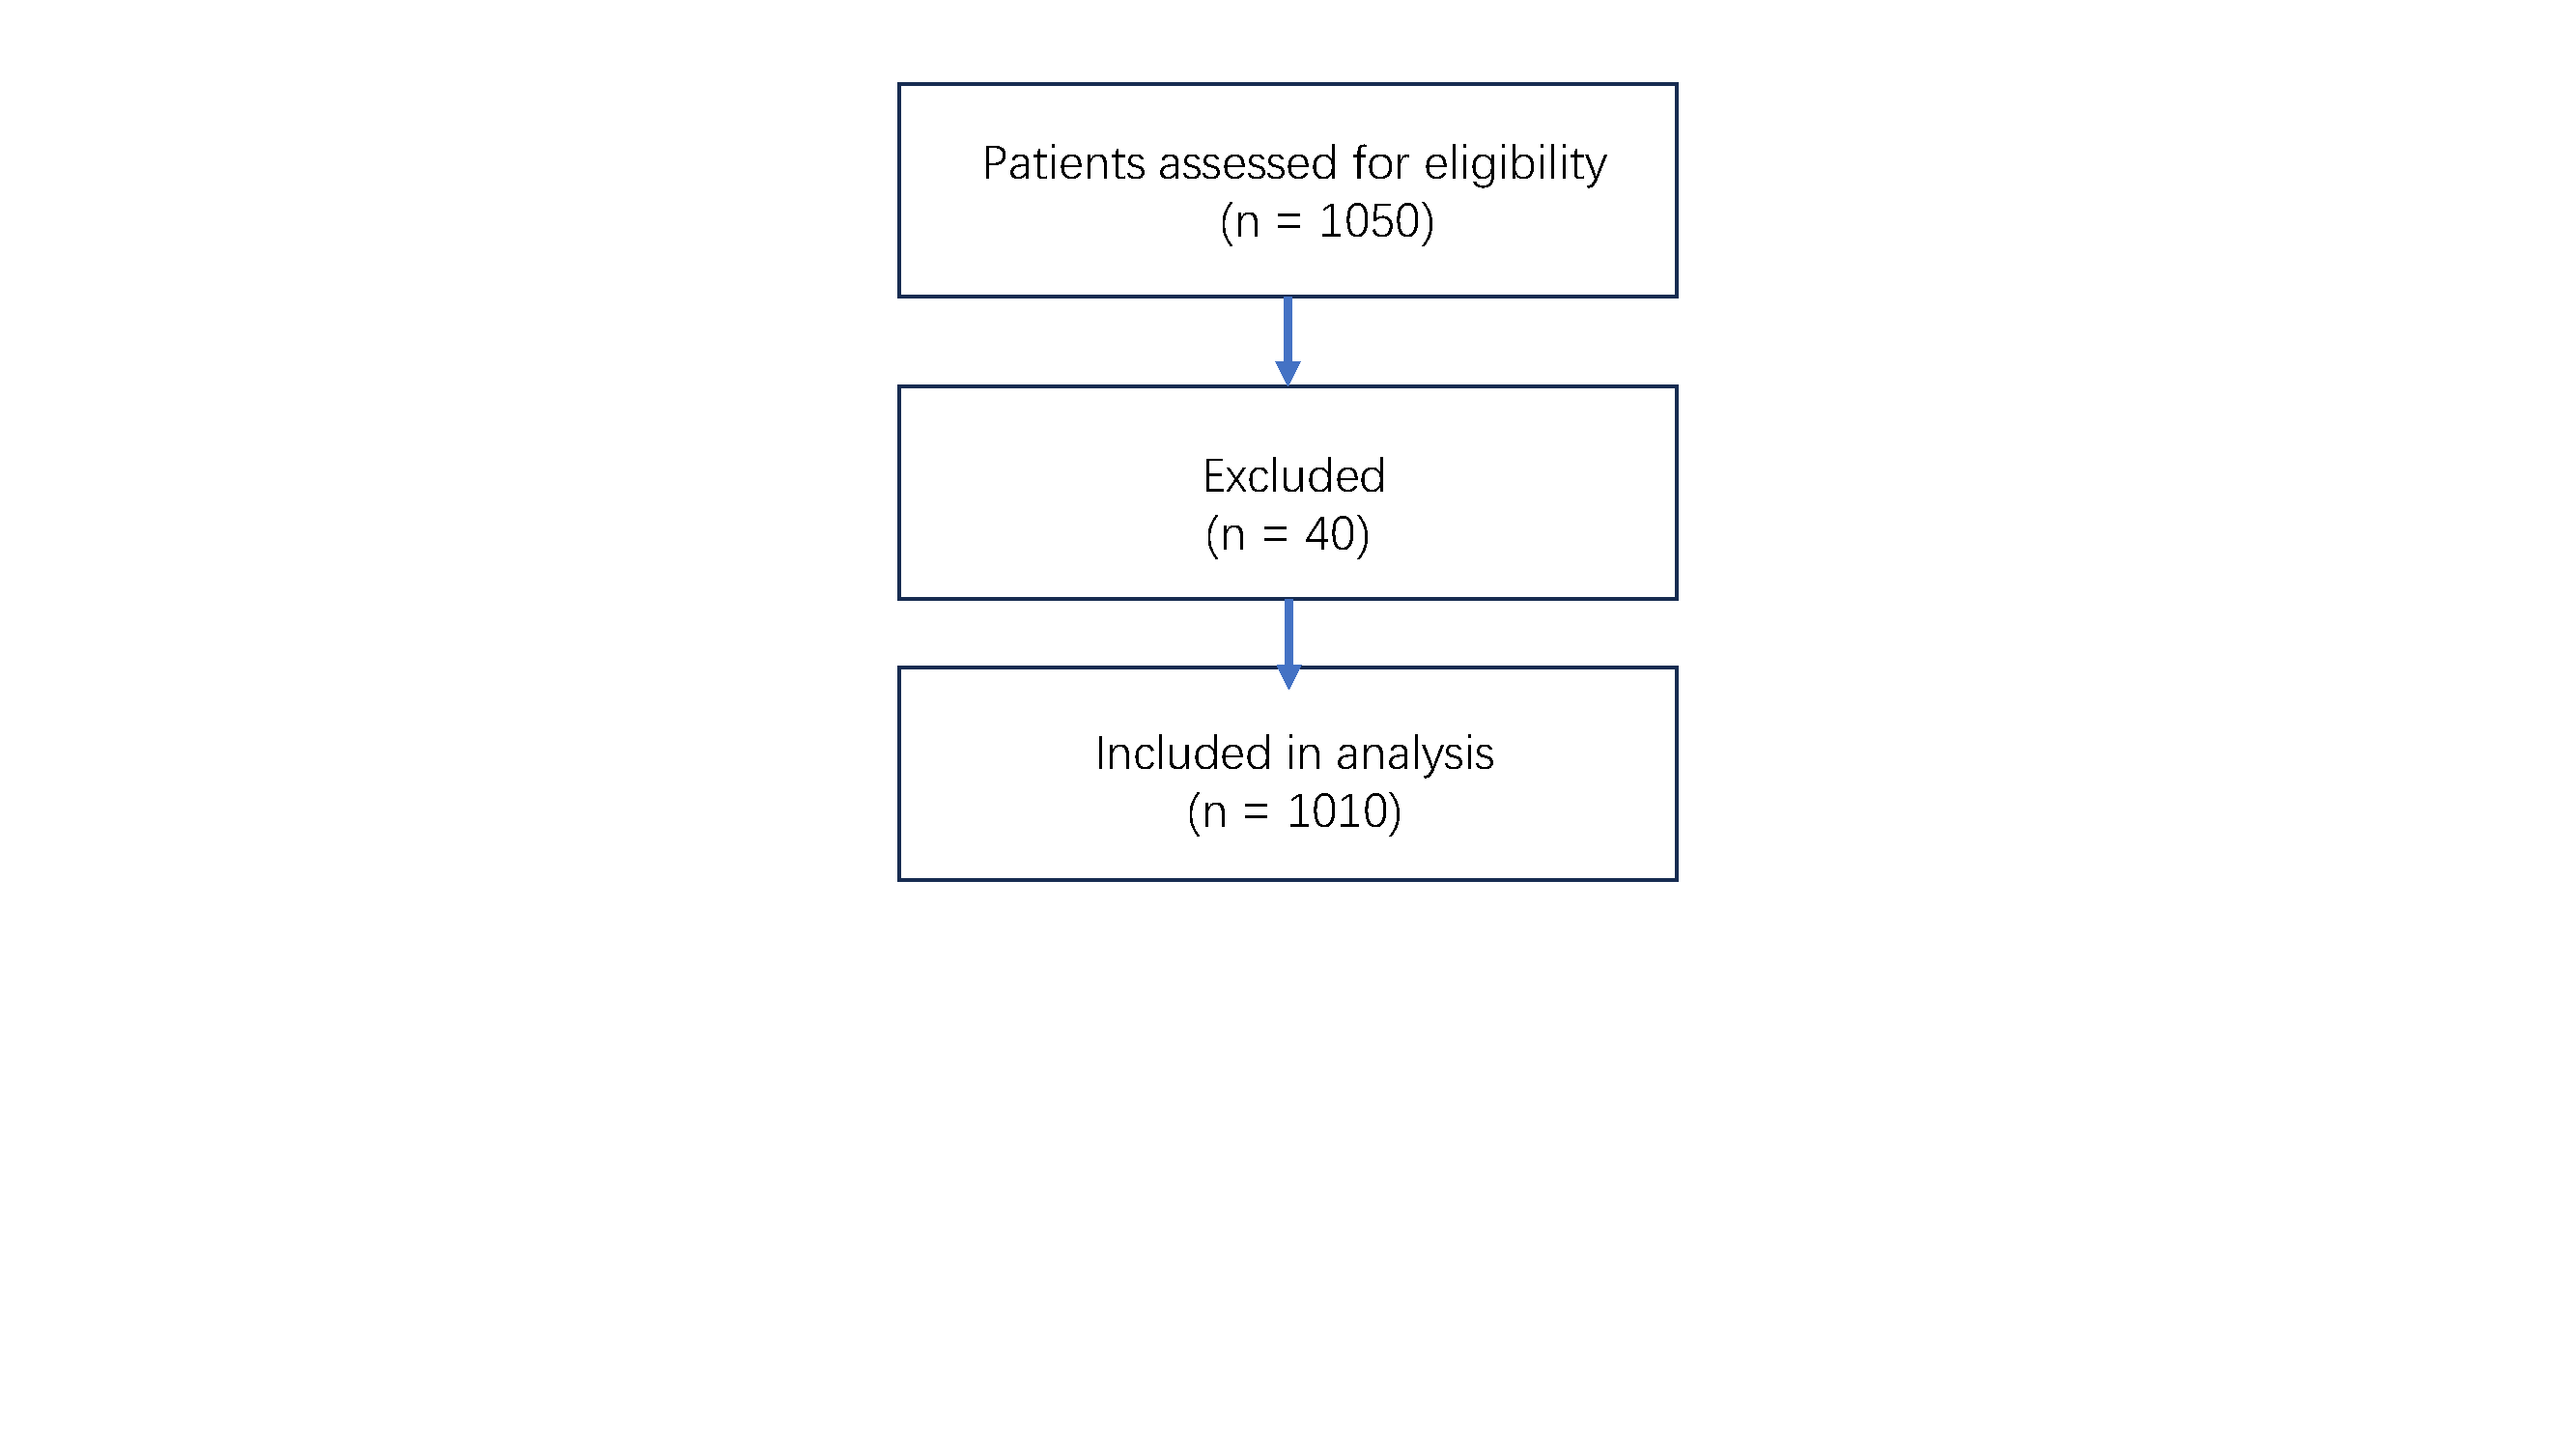


**Figure S2. Spearman correlation matrix between SCORAD and patient-reported outcome measures.**

Spearman correlation heatmap (n=50, Affiliated Hospital of Xuzhou Medical University). Confirms strong positive correlations between SCORAD and PROs (ρ=0.59-0.75; strongest SCORAD-POEM ρ=0.75, all P<0.001), validating main text findings with clear visual representation.
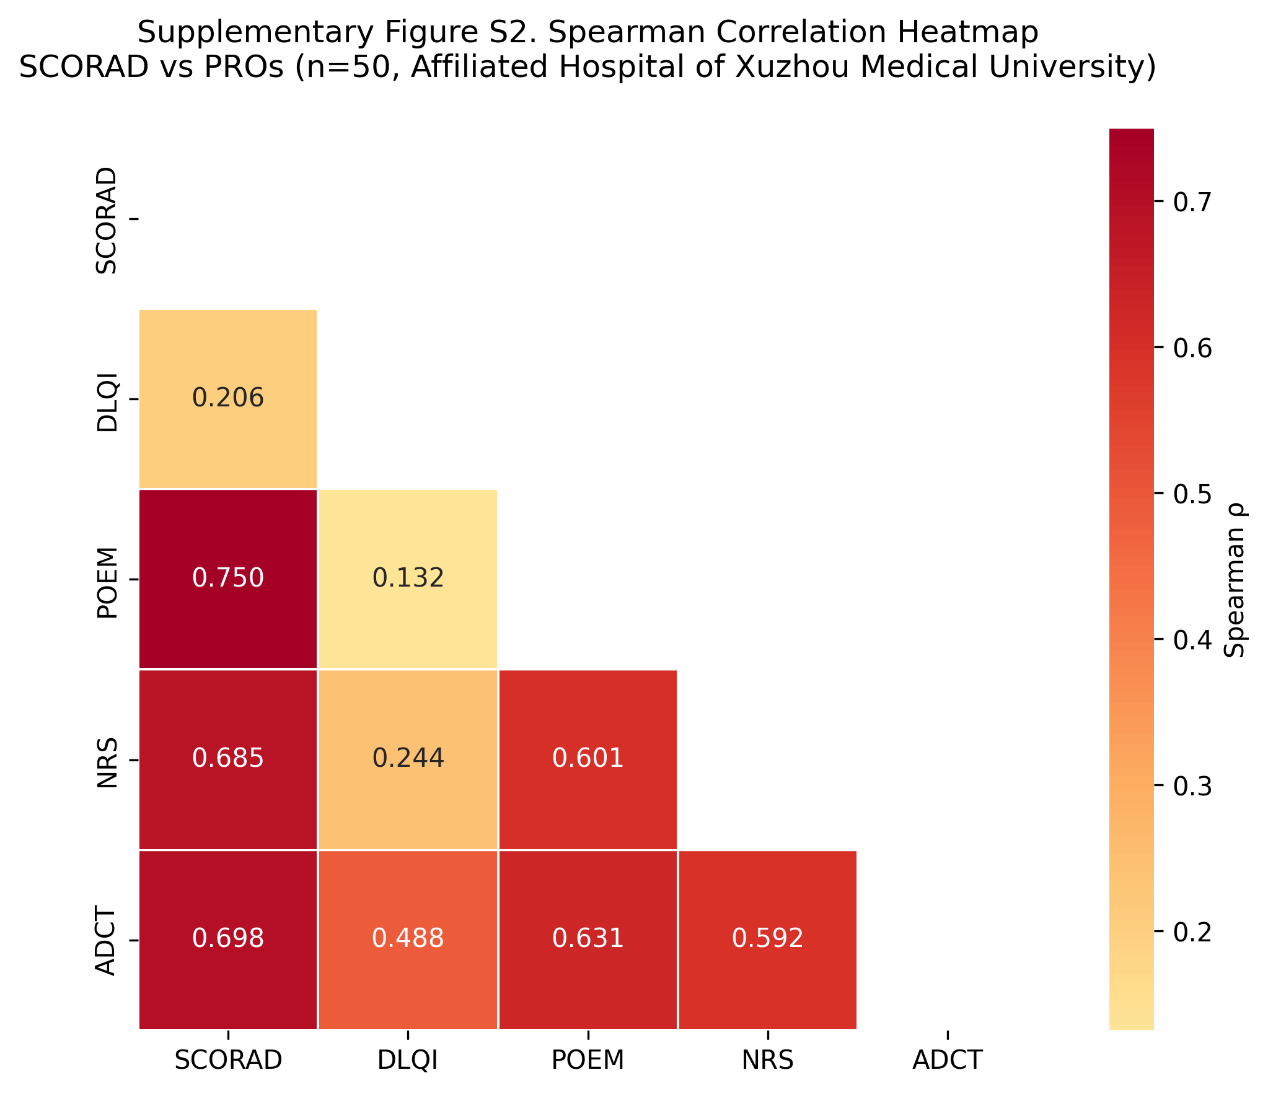

Supplement: Supplementary file 1 [file 431875%20Supplementary%20Material.docx]
